# Supplementary material for: Temperature sensitive synthesis of γ-Al2O3support with different morphologies for CoMo/γ-Al2O3catalysts for hydrodesulfurization of thiophene and 4,6-dimethyldibenzothiophene
Source: Royal Society of Chemistry journal article supplement (doi:10.1039/c6cy02241c), 2016-12-20
Supplement: c6cy02241c1.pdf [file c6cy02241c1.pdf]

# Temperature Sensitive Synthesis of $\gamma$ -Al<sub>2</sub>O<sub>3</sub> Support with different Morphologies for CoMo/ $\gamma$ -Al<sub>2</sub>O<sub>3</sub> Catalysts towards Hydrodesulfurization of Thiophene and 4,6-Dimethyldibenzothiophene

Sijia Liu, Xin Liang\*, Jie Zhang\*, Biaohua Chen

## SUPPORTING INFORMATION

### Captions

**SI 1.** Test for external mass transport limitation.

**SI 2. Figure S1.** Relationships between conversion and H<sub>2</sub>/oil ratio.

**SI 3.** Weisz-Prater Criterion for Internal Diffusion.

**SI 4.** Calculation of the crystalline aggregation ratio.

**SI 5.** Analysis of products from the conversion of 1-hexene.

### **SI 1. Test for external mass transport limitation:**

To evaluate the external mass transport limitation during HDS reaction, the HDS reaction using CoMo/CA as catalyst with different H<sub>2</sub>/oil ratios were tested (Fig. S1). Finally, we found that once the H<sub>2</sub>/oil ratio was higher than 300, the conversions of thiophene and 4,6-DMDBT did not have a obvious difference (Fig. S1). Considering this, we chose 400 as the H<sub>2</sub>/oil ratio for the formal HDS reaction, it could be concluded that the external mass transport limitation could be neglected.

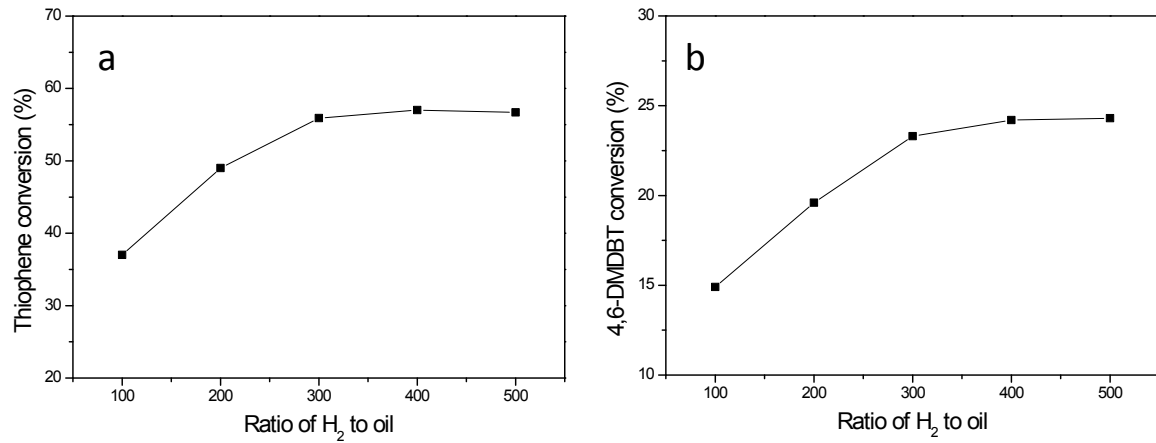

**SI 2. Figure S1 Relationships between conversion and H<sub>2</sub>/oil ratio:** (a) HDS of a mixture of thiophene and n-hexene-1 (220 °C); (b) HDS of 4,6-DMDBT (300 °C)

**SI 3. Weisz-Prater Criterion for Internal Diffusion:**

If 
$$C_{WP} = \frac{-r_{(obs)}\rho_c R^2}{D_e C_s} < 1$$
, then internal mass transfer effects can be neglected.

$-r_{(obs)}$  = observed HDS reaction rate, kmol/kg-cat·s

R = catalyst particle radius, m

$\rho_c$  = solid catalyst density, kg/m<sup>3</sup>

$D_e$  = effective liquid-phase diffusivity of H<sub>2</sub>, m<sup>2</sup>/s

= 0.1D (according to the calculation method of Crezee et al.), where

D = liquid-phase diffusivity of H<sub>2</sub>, m<sup>2</sup>/s

$C_s$  = concentration of H<sub>2</sub> at the catalyst surface, kmol /m<sup>3</sup>

For HDS of a mixture of thiophene and n-hexene-1:

$$C_{WP} = \frac{-r_{(obs)}\rho_c R^2}{D_e C_s} = (1.57 \times 10^{-8} \text{ kmol/kg-cat}\cdot\text{s}) \times (500 \text{ kg/m}^3) \times (4.25 \times 10^{-4} \text{ m})^2 / [(3.23 \times 10^{-10} \text{ m}^2/\text{s}) \times (0.478 \text{ kmol/m}^3)] = 9.2 \times 10^{-3} < 1$$

So, it can be concluded that the internal mass transfer effects in HDS of a mixture of thiophene and n-hexene-1 can be neglected.

For HDS of 4,6-DMDBT:

$$C_{WP} = \frac{-r_{(obs)}\rho_c R^2}{D_e C_s} = (1.18 \times 10^{-8} \text{ kmol/kg-cat}\cdot\text{s}) \times (500 \text{ kg/m}^3) \times (4.25 \times 10^{-4} \text{ m})^2 / [(45.84 \times 10^{-10} \text{ m}^2/\text{s}) \times (0.406 \text{ kmol/m}^3)] = 5.7 \times 10^{-4} < 1$$

So, it can be concluded that the internal mass transfer effects in HDS of 4,6-DMDBT can be neglected.

To avoid the influence of internal diffusion, the Weisz-Prater criterion was calculated with the “worst-case”, which made a largest  $C_{WP}$  value (we assumed that all thiophene/4,6-DMDBT were converted).

#### **SI 4. Calculation of the crystalline aggregation ratio.**

The crystalline aggregation ratios of the  $\gamma$ -Al<sub>2</sub>O<sub>3</sub> products are calculated according to the following equation [1]:

$$\text{crystalline aggregation ratio} = \frac{SA_{theor}}{SA_{BET}}$$

where SA is surface area ( $\text{m}^2 \text{g}^{-1}$ ) and  $SA_{theor} = 6000/(\rho_{\gamma\text{-Al}_2\text{O}_3} \times D)$  ( $\rho_{\gamma\text{-Al}_2\text{O}_3} = 3.65 \text{ g cm}^{-3}$ , the theoretical density of the  $\gamma\text{-Al}_2\text{O}_3$  phase, and D is the average crystalline size (nm) derived from the X-ray diffraction data by the Debye-Scherrer formula).

### SI 5. Analysis of products from the conversion of 1-hexene.

Detailed analysis of products from the hydrogenation and isomerization of 1-hexene over CoMo/ACH catalyst with the heptane solution containing 10 % 1-hexene and 1000 ppm thiophene by using GC-MS Instrument <sup>a</sup>.

| product             | Content (%) |
|---------------------|-------------|
| 1-hexene            | 8.11        |
| 2-hexene            | 0.07        |
| 3-hexene            | 0.14        |
| n-hexane            | 1.62        |
| 2-methyl-pentane    | 0.06        |
| 3-methyl-pentane    | 0.05        |
| n-heptane (solvent) | 89.95       |

a Reaction conditions: P = 2.0 Mpa, T = 220 °C, LHSV = 4.76h<sup>-1</sup>, and H<sub>2</sub>/feed ratio=400/1 (v/v).

To verify the main reaction for 1-hexene conversion, GC-MS instrument was used to analyze the product. The result showed that more than 85 % product were n-hexane and more than 91 % product were alkane, which indicated that hydrogenation was the mainly reaction. So the conversion of 1-hexene could be regarded as the hydrogenation (HYD) conversion of 1-hexene.

1. R. Vidruk, M. V. Landau, M. Herskowitz, V. Ezersky and A. Goldbourt, *J. Catal.*, 2011, **282**, 215-227.
